# Supplementary material for: Molecular biomarkers screened by next-generation RNA sequencing for non-sentinel lymph node status prediction in breast cancer patients with metastatic sentinel lymph nodes
Source: Springer Nature journal article supplement (doi:10.1186/s12957-015-0642-2), 2015-08-26

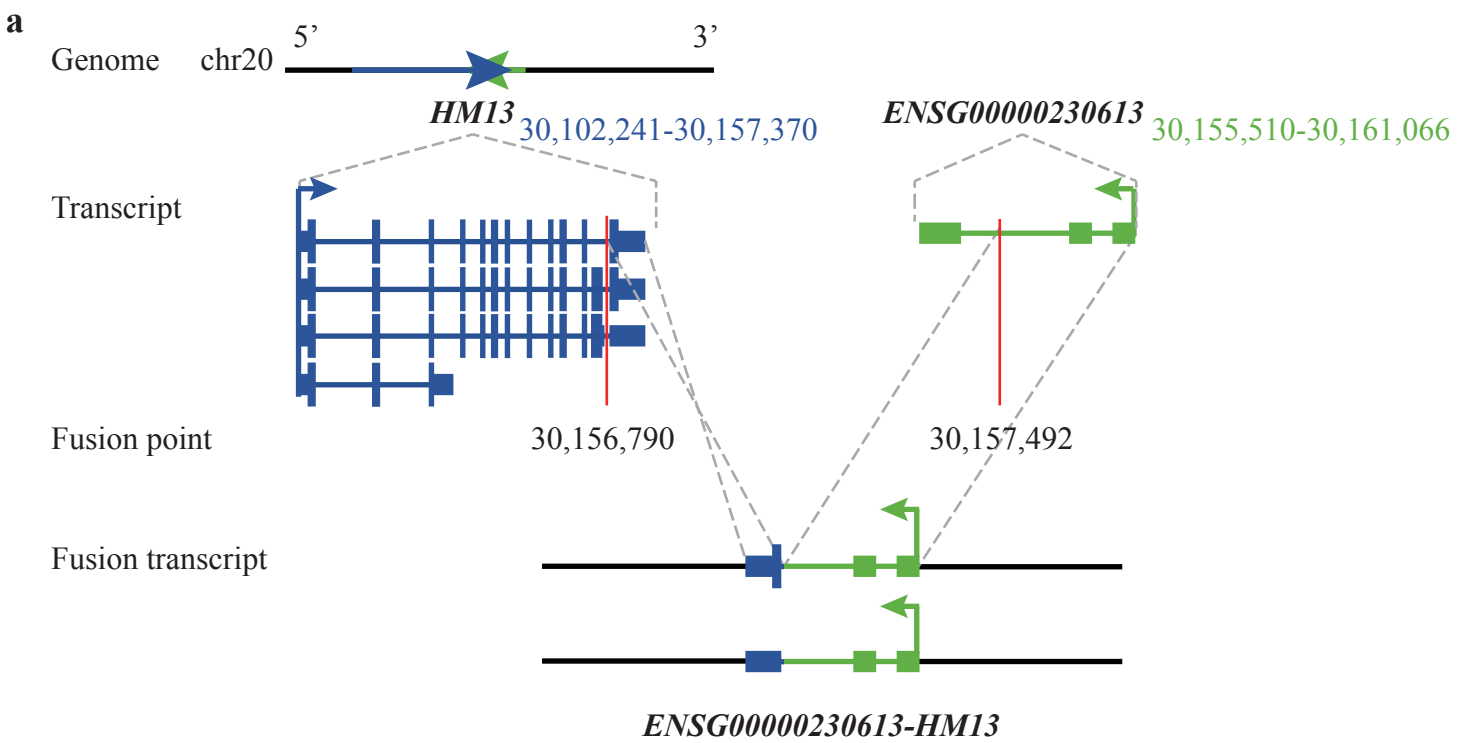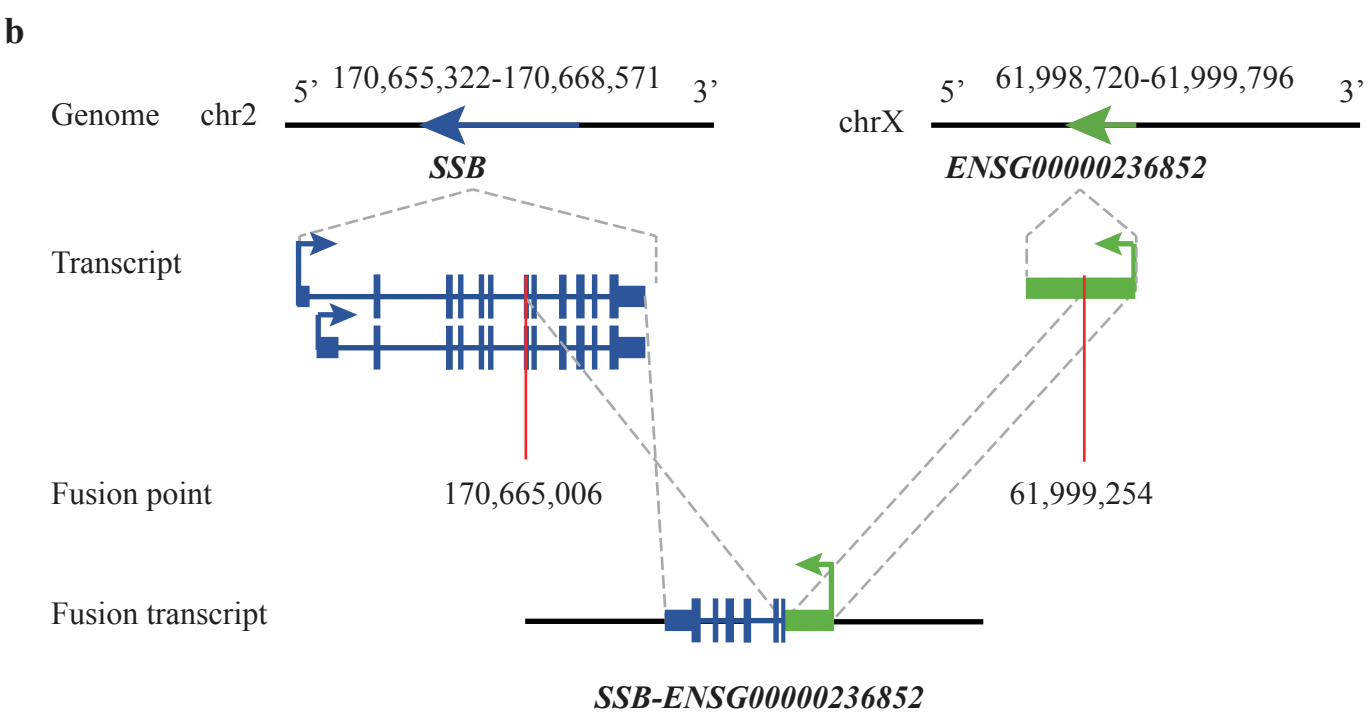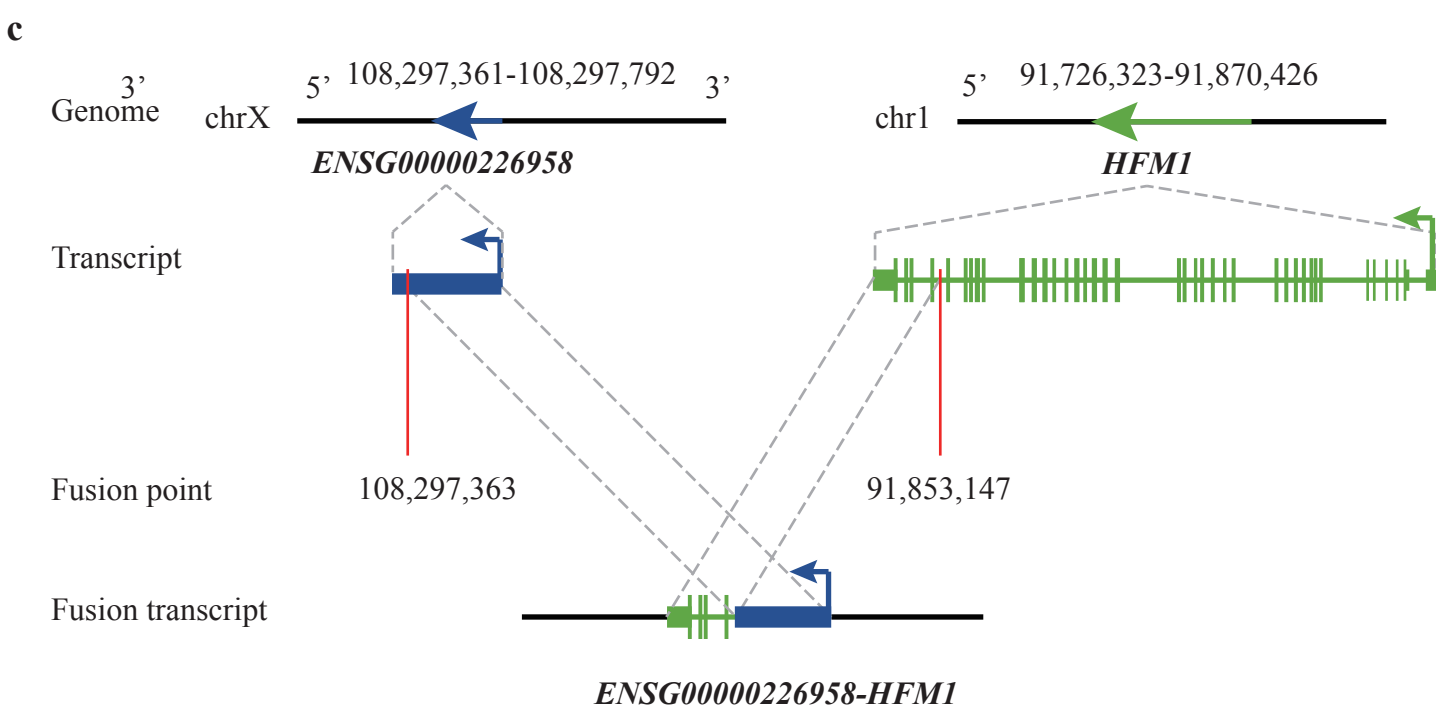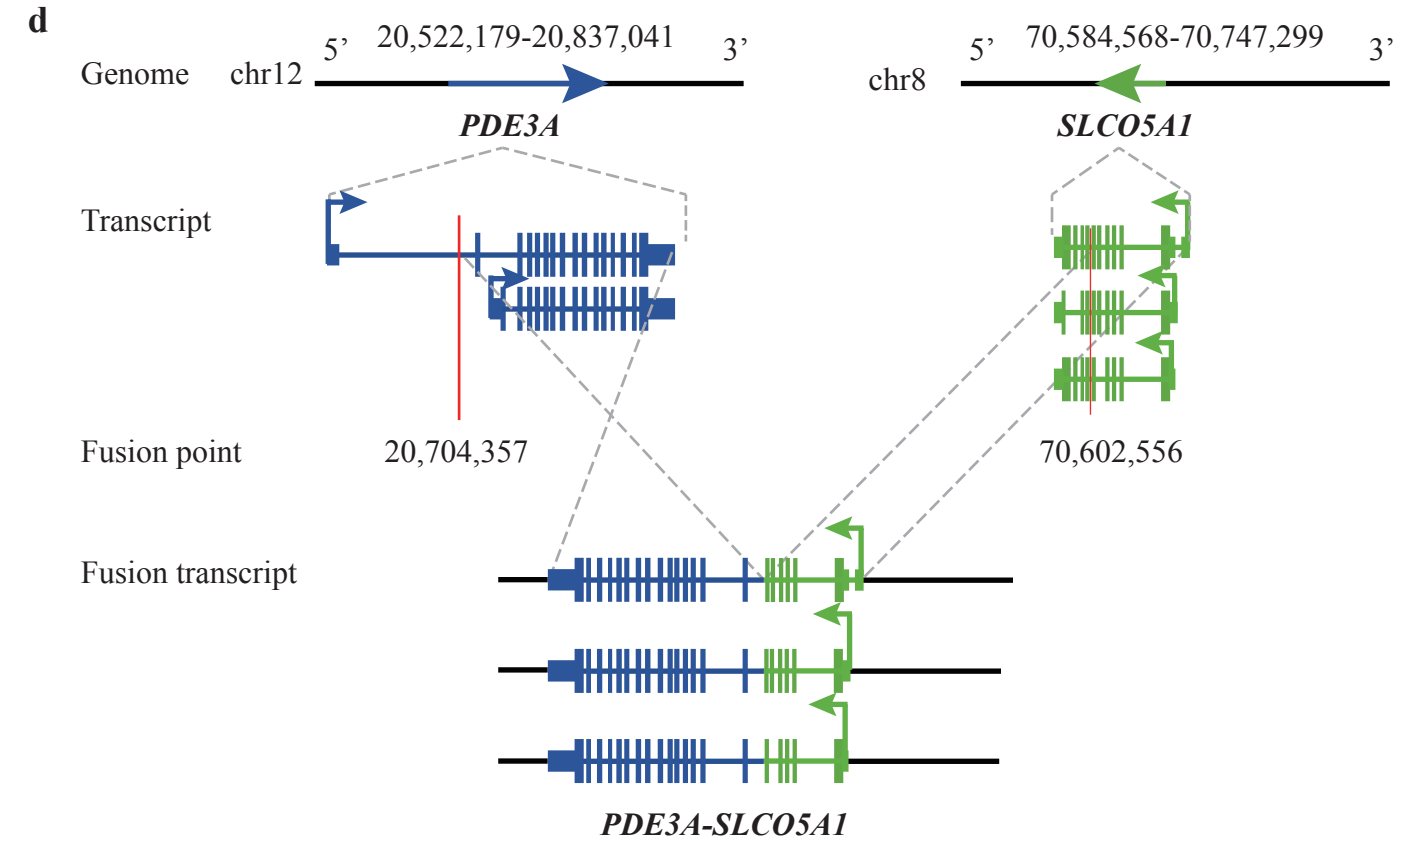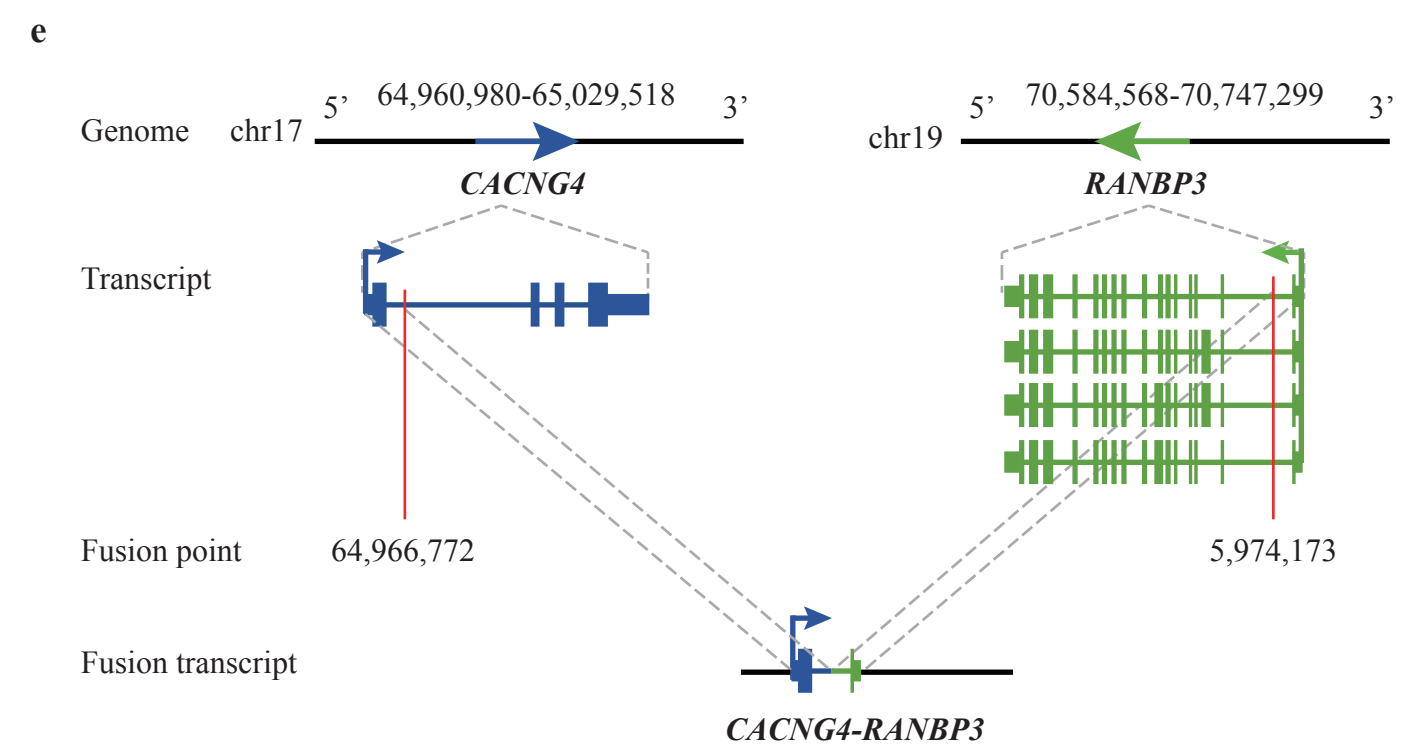

Supplement: MOESM8 [file 9764886]
